# Supplementary material for: How to teach an old dog new (electrochemical) tricks: aziridine-functionalized CNTs as efficient electrocatalysts for the selective CO2 reduction to CO
Source: Royal Society of Chemistry journal article supplement (doi:10.1039/c8ta04267e), 2018-01-01
Supplement: c8ta04267e1.pdf [file c8ta04267e1.pdf]

Electronic Supplementary Information (ESI)

G. Tuci *et al.*

*Aziridine-Functionalized CNTs as Efficient Electrocatalysts for the Selective CO<sub>2</sub> Reduction to CO*

# How to Teach an Old Dog New (Electrochemical) Tricks: Aziridine-Functionalized CNTs as Efficient Electrocatalysts for the Selective CO<sub>2</sub> Reduction to CO

Giulia Tuci,<sup>a,b</sup> Jonathan Filippi,<sup>a</sup> Housseinou Ba,<sup>c</sup> Andrea Rossin,<sup>a</sup> Lapo Luconi,<sup>a</sup> Cuong Pham-Huu,<sup>c,\*</sup>  
Francesco Vizza<sup>a,\*</sup> and Giuliano Giambastiani<sup>a,c,d\*</sup>

<sup>a</sup> *Institute of Chemistry of OrganoMetallic Compounds, ICCOM-CNR and Consorzio INSTM, Via Madonna del Piano, 10 – 50019, Sesto F.no, Florence, Italy. \*E-mail: [francesco.vizza@iccom.cnr.it](mailto:francesco.vizza@iccom.cnr.it), [giuliano.giambastiani@iccom.cnr.it](mailto:giuliano.giambastiani@iccom.cnr.it)*

<sup>b</sup> *Department of Chemistry “Ugo Schiff”, University of Florence, 50019, Sesto Fiorentino, Italy.*

<sup>c</sup> *Institut de Chimie et Procédés pour l’Energie, l’Environnement et la Santé (ICPEES), UMR 7515 CNRS- University of Strasbourg (UdS), 25, rue Becquerel, 67087 Strasbourg Cedex 02, France. \*Email: [cuong.pham-huu@unistra.fr](mailto:cuong.pham-huu@unistra.fr)*

<sup>d</sup> *Kazan Federal University, 420008 Kazan, Russian Federation.*

## Contents:

|                                                                                                                                                                                                                                                     |    |
|-----------------------------------------------------------------------------------------------------------------------------------------------------------------------------------------------------------------------------------------------------|----|
| <b>Fig. S1.</b> XPS N 1s core regions of N <sup>Az</sup> -MW (1), N <sup>AzBoc</sup> -MW (2) and N <sup>Acr</sup> -MW (3) .....                                                                                                                     | S2 |
| <b>Fig. S2.</b> XPS N 1s core region of 1 after air and CO <sub>2</sub> exposure .....                                                                                                                                                              | S3 |
| <b>Table S1.</b> Elemental analyses and acid-base titrations on N <sup>X</sup> -MW samples (X = Az, AzBoc, Acr) .....                                                                                                                               | S3 |
| <b>Fig. S3.</b> CVs of MWCNT/Cc and 1-3/Cc as electrocatalysts under N <sub>2</sub> - and CO <sub>2</sub> -saturated environment .....                                                                                                              | S4 |
| <b>Fig. S4.</b> Home-made 3D-printed ABS three-electrode cell equipped with an [Ag][AgCl][KCl <sub>sat</sub> ] reference electrode, a Pt counter electrode and a gas collector cone on the top for sampling volatiles .....                         | S4 |
| <b>Fig. S5.</b> GC traces of gas-phases for electrolysis runs at -1.25 and -1.50V with 1/Cc .....                                                                                                                                                   | S5 |
| <b>Fig. S6.</b> Total current densities for CO <sub>2</sub> RR with 1-3/Cc and MWCNT/Cc in the -0.8 ÷ -1.6 V range .....                                                                                                                            | S6 |
| <b>Fig. S7.</b> XPS survey spectra of plain carbon cloth (Cc), freshly prepared 1/Cc and exhaust 1/Cc .....                                                                                                                                         | S7 |
| <b>Table S2.</b> Relative at.% of main elements from the XPS survey spectra of carbon cloth (Cc), and 1/Cc before and after use in electrocatalysis .....                                                                                           | S7 |
| <b>Fig. S8.</b> DFT optimized structures of aziridine NBoc- and NH-carbonate groups as edge or basal plane dangling moieties on a polycyclic aromatic hydrocarbon cluster model .....                                                               | S8 |
| <b>Table S3.</b> Net Bader Charges (q) of the C <sup>αsp<sup>3</sup></sup> /C <sup>αsp<sup>2</sup></sup> atoms on DFT optimized N-heterocycles as edge or basal-plane dangling fragments of a polycyclic (hetero)aromatic hydrocarbon cluster ..... | S8 |
| <b>References</b> .....                                                                                                                                                                                                                             | S9 |

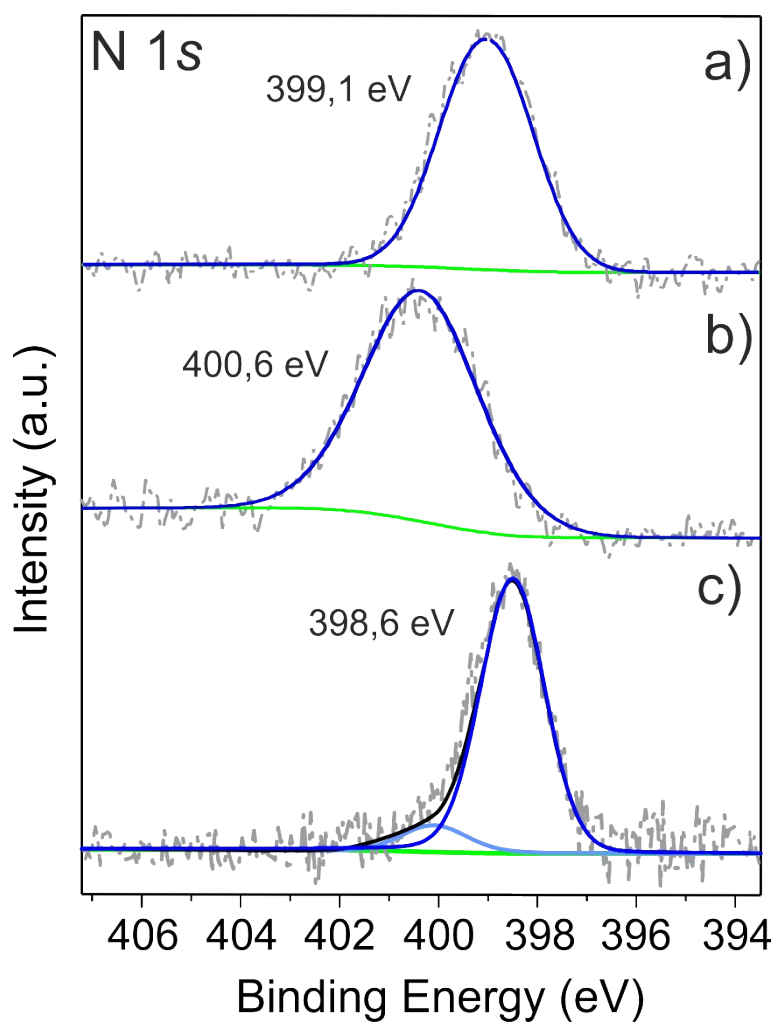

**Fig. S1.** N 1s core regions and relative fits for the high resolution XPS spectrum of N<sup>Az</sup>-MW (**1**), N<sup>AzBoc</sup>-MW (**2**) and N<sup>Acr</sup>-MW (**3**). A minor shoulder in **3** (at higher binding energy) is ascribed to commonly observed surface contaminations.<sup>1-3</sup>

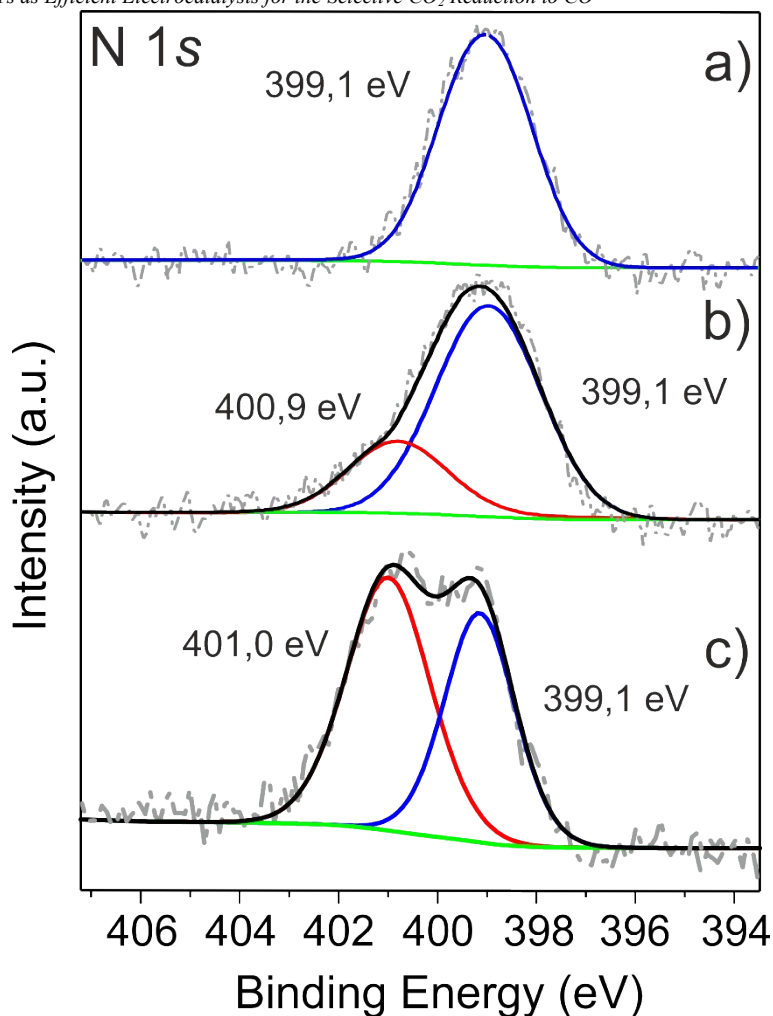

**Fig. S2.** N 1s core region and relative fit for the high resolution XPS spectrum of N<sup>Az</sup>-MW sample as freshly prepared (a), after sample exposure on air for few minutes (b) and after a forced exposure to a stream of CO<sub>2</sub> (atm. press.) for 1 h (c). N 1s components at higher binding energies (400.9 and 401.0 eV) in Fig. S2b and S2c are attributed to the formation of amine-carbonate whereas components at 399.1 eV belong to free aziridine groups.

|                                     | (Elemental analyses) |      | (acid-base titration) | N% <sup>a</sup> |
|-------------------------------------|----------------------|------|-----------------------|-----------------|
|                                     | N%                   | C%   | N%                    |                 |
| N <sup>Az</sup> -MW (1) (1° run)    | 0.69                 | 95.2 | 0.71                  | <b>0.73</b>     |
| N <sup>Az</sup> -MW (1) (2° run)    | 0.86                 | 95.8 | 0.64                  |                 |
| N <sup>Az</sup> -MW (1) (3° run)    | 0.83                 | 94.9 | 0.66                  |                 |
| N <sup>AzBoc</sup> -MW (2) (1° run) | 0.86                 | 91.0 | -                     | <b>0.81</b>     |
| N <sup>AzBoc</sup> -MW (2) (2° run) | 0.79                 | 91.5 | -                     |                 |
| N <sup>AzBoc</sup> -MW (2) (3° run) | 0.77                 | 91.1 | -                     |                 |
| N <sup>Acr</sup> -MW (3) (1° run)   | 1.64                 | 93.1 | 1.32                  | <b>1.42</b>     |
| N <sup>Acr</sup> -MW (3) (2° run)   | 1.52                 | 92.5 | 1.30                  |                 |
| N <sup>Acr</sup> -MW (3) (3° run)   | 1.56                 | 93.2 | 1.20                  |                 |
| MWCNTs                              | -                    | 97.2 | -                     | -               |

**Table S1.** Elemental analyses and acid-base titrations on N<sup>X</sup>-MW samples (X = Az, AzBoc, Acr) for the determination of the N<sup>X</sup> loading. Values are determined for each sample through three independent runs. <sup>a</sup> Final N<sup>X</sup> content measured as average value from Elemental analysis and acid-base titration.

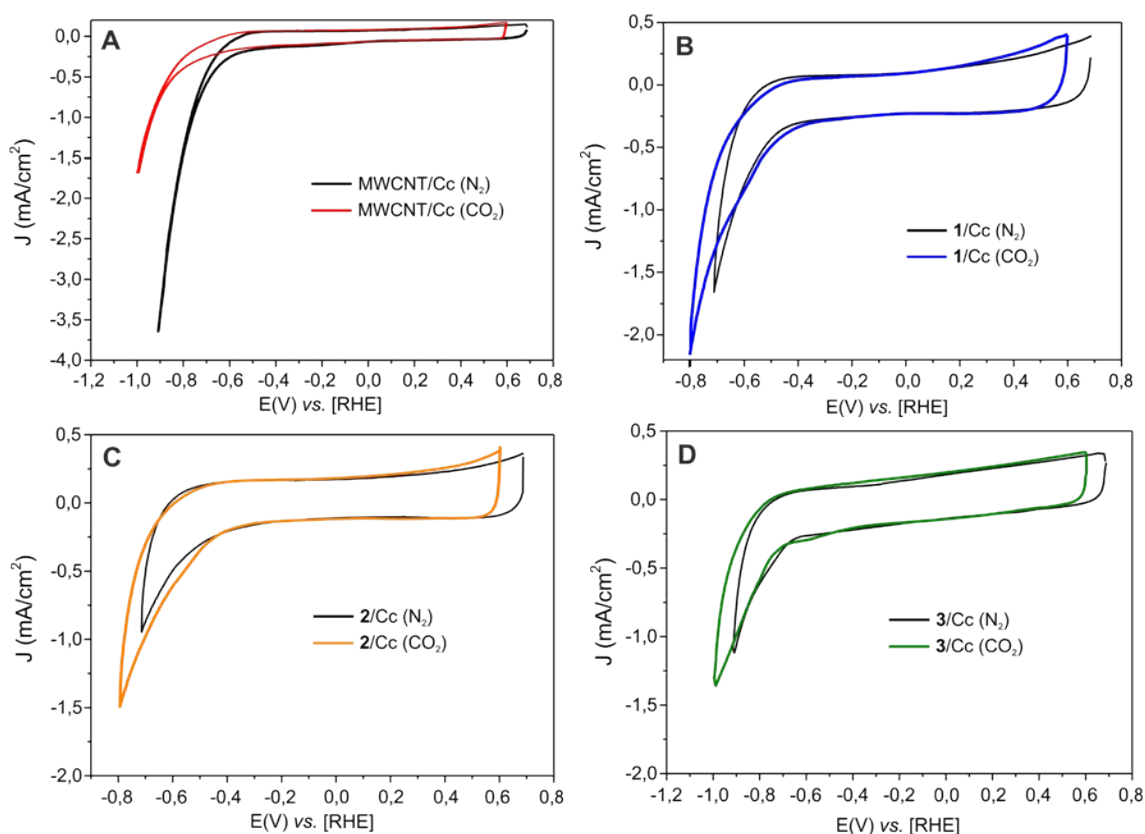

**Fig. S3.** Cyclic voltammograms for electrocatalysts MWCNT/Cc (A), 1/Cc (B), 2/Cc (C) and 3/Cc (D) under a CO<sub>2</sub>-saturated 0.1 M KHCO<sub>3</sub> solution (colored curves). For the sake of completeness, CV profiles recorded under N<sub>2</sub> saturated environment are also outlined (black curves). Potentials were linearly swept in the  $-1.6$  to  $0.0$  V at a scan rate of  $10 \text{ mV s}^{-1}$  vs. Ag/AgCl/KCl<sub>sat.</sub> and then re-scaled towards the reversible hydrogen electrode (RHE) taking into account the pH value of the respective solutions.  $E$  (vs. RHE) =  $E$  (vs. Ag/AgCl) +  $0.197 \text{ V} + 0.0591 \cdot \text{pH}$ . pH of the N<sub>2</sub> saturated 0.1 M KHCO<sub>3</sub> solution: 8.3; pH of the CO<sub>2</sub> saturated 0.1 M KHCO<sub>3</sub> solution: 6.8.

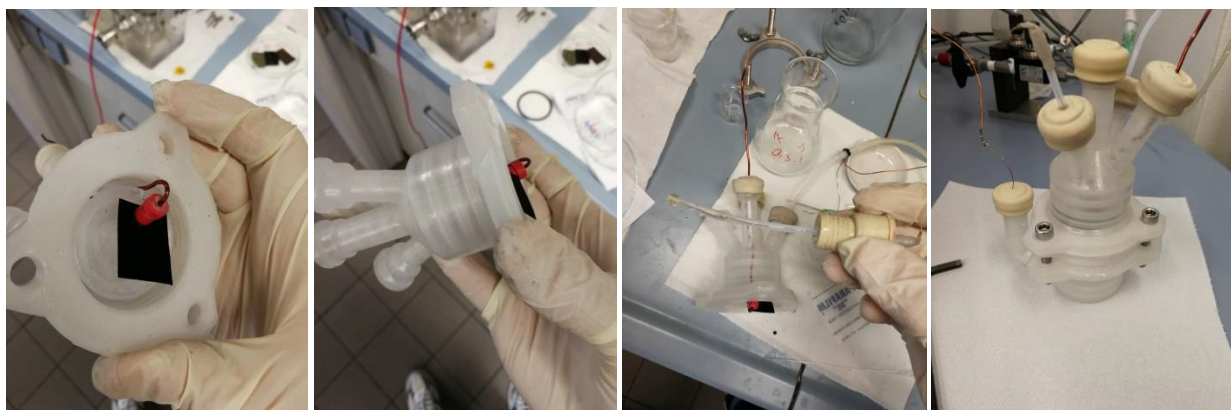

**Fig. S4.** Home-made 3D-printed ABS<sup>4</sup> three-electrode cell operating in a 0.1M KHCO<sub>3</sub> solution, equipped with an [Ag][AgCl][KCl<sub>sat.</sub>] reference electrode, a Pt counter electrode and a gas collector cone on the top for the sampling of the produced volatiles.

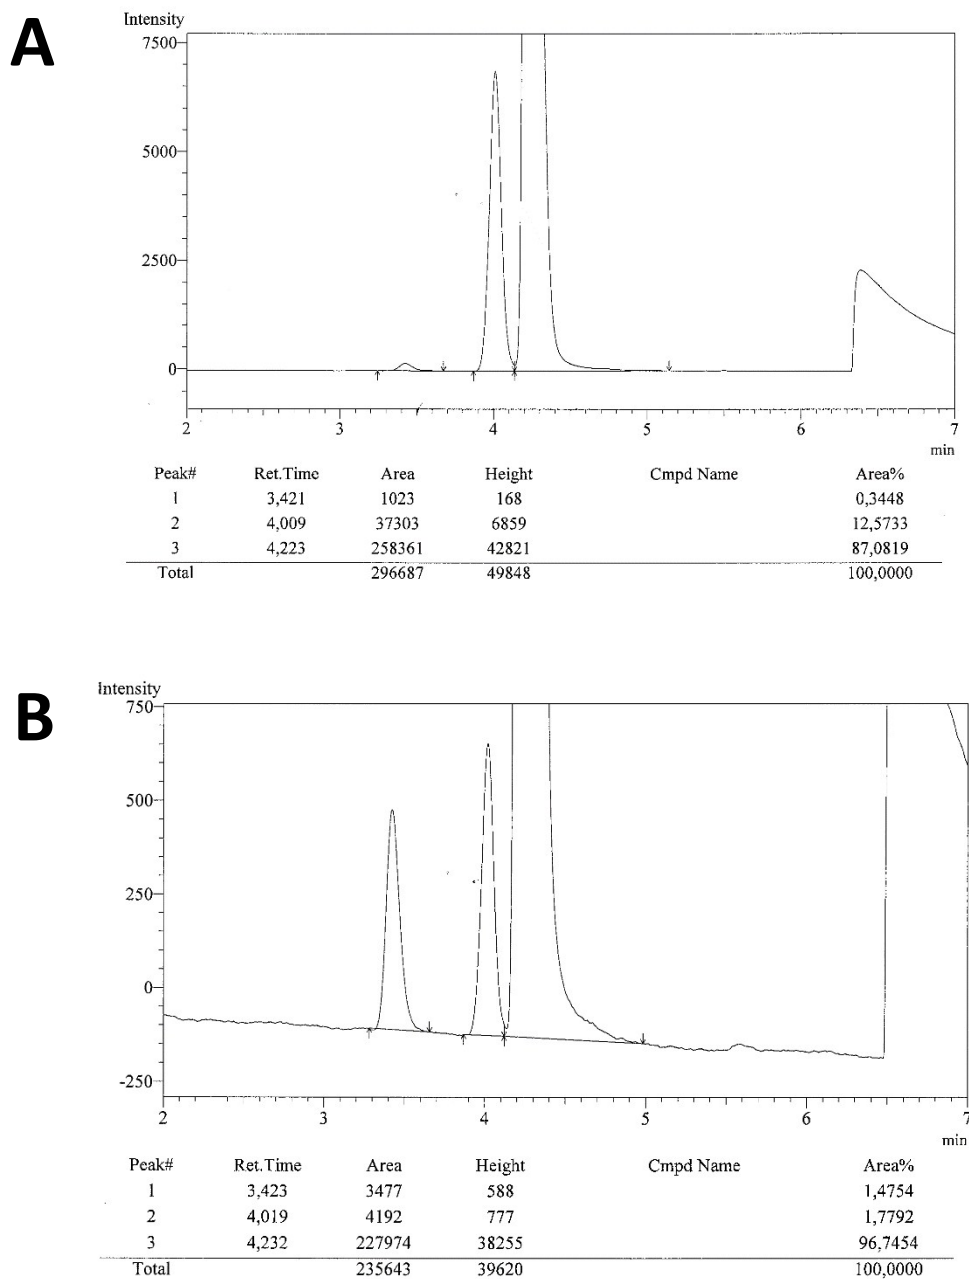

**Fig. S5.** GC-MS traces of volatile products for two CO<sub>2</sub>RR runs with **1**/Cc as electrocatalyst at -1.25 and -1.50 V vs. [Ag][AgCl][KCl<sub>sat</sub>] after 45 min and 15 min electrolysis time, respectively, at constant potential value. Peaks (from left to right) are: H<sub>2</sub> (ret. time ≈ 3.4 min), N<sub>2</sub> (ret. time ≈ 4.0 min), CO (ret. time ≈ 4.2 min); CO<sub>2</sub> (ret. time ≈ 6.4 min). Peak areas are corrected according to calibration curves registered previously for each gas (H<sub>2</sub> correction factor: 138.8, CO correction factor: 7189.3).

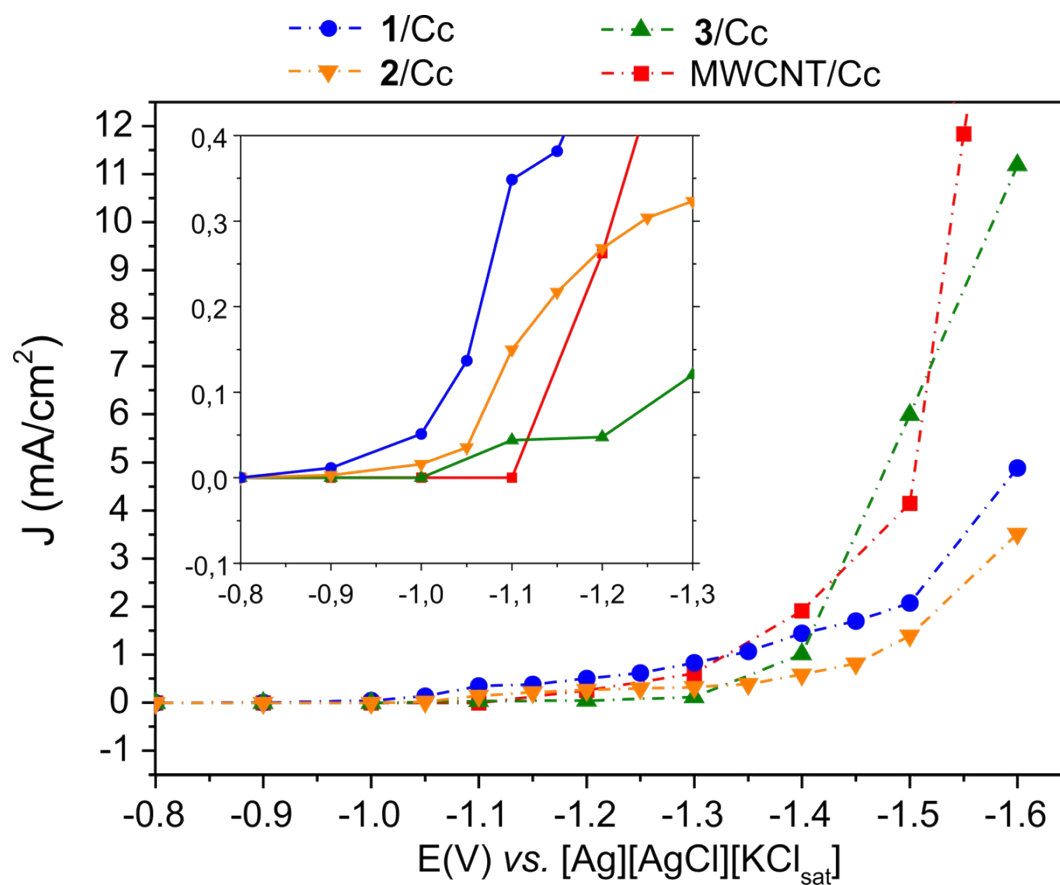

**Fig. S6.** Total current densities measured for  $\text{CO}_2$ RR with **1-3/Cc** and MWCNT/Cc in the  $-0.8 \div -1.6$  V range vs.  $\text{Ag}/\text{AgCl}/\text{KCl}_{\text{sat.}}$  as the reference electrode. Inset refers to the magnification of  $J_{\text{tot}}$  profiles at the lower overpotentials where electroreduction starts.

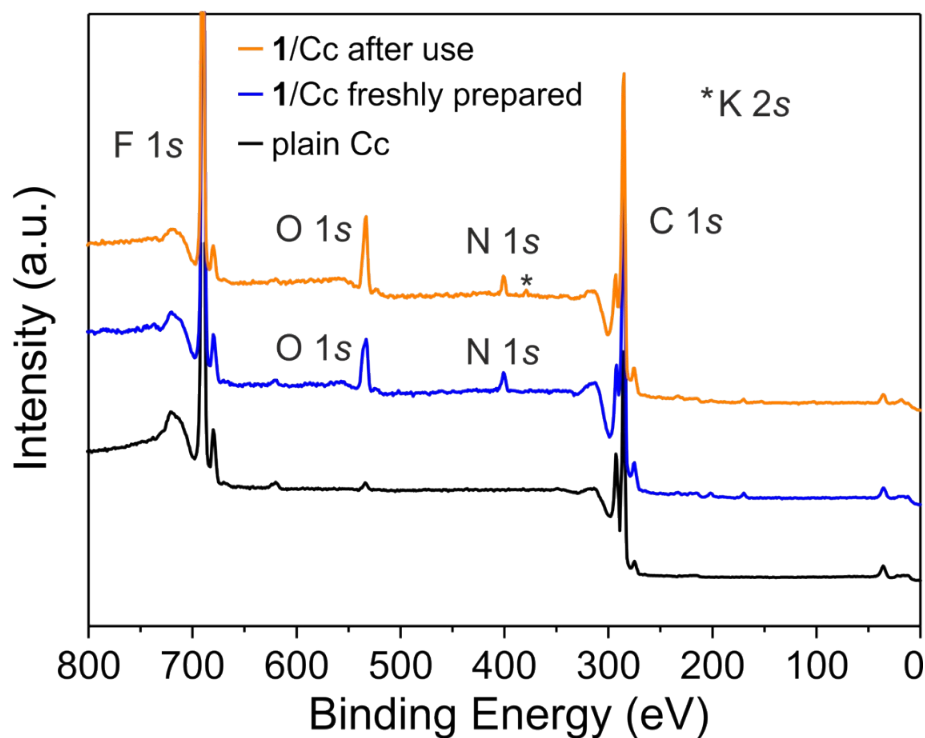

**Fig. S7.** XPS survey spectra of plain Teflonised carbon cloth (Cc) (black line), the freshly prepared 1/Cc (blue line) and used 1/Cc (orange line). The minor component at 379 eV in the spectrum of 1/cc after use is ascribed to K 2s component due of residual KHCO<sub>3</sub> traces. The primary K 2p component overlaps with C 1s region.<sup>5, 6</sup>

| Sample                  | O (at.%) | N (at.%) | C (at.%) | F (at.%) | O/C ratio | N/C ratio |
|-------------------------|----------|----------|----------|----------|-----------|-----------|
| Carbon cloth (Cc)       | 0.9      | 0        | 59.4     | 39.7     | -         | -         |
| 1/Cc – freshly prepared | 4.3      | 2.2      | 71       | 22.5     | 0.06      | 0.03      |
| 1/Cc – after use        | 6.8      | 1.9      | 73.2     | 18.1     | 0.09      | 0.03      |

**Table S2.** Relative at.% of main elements from the XPS survey spectra of plain carbon cloth (Cc), the freshly prepared 1/Cc and the 1/Cc after use.



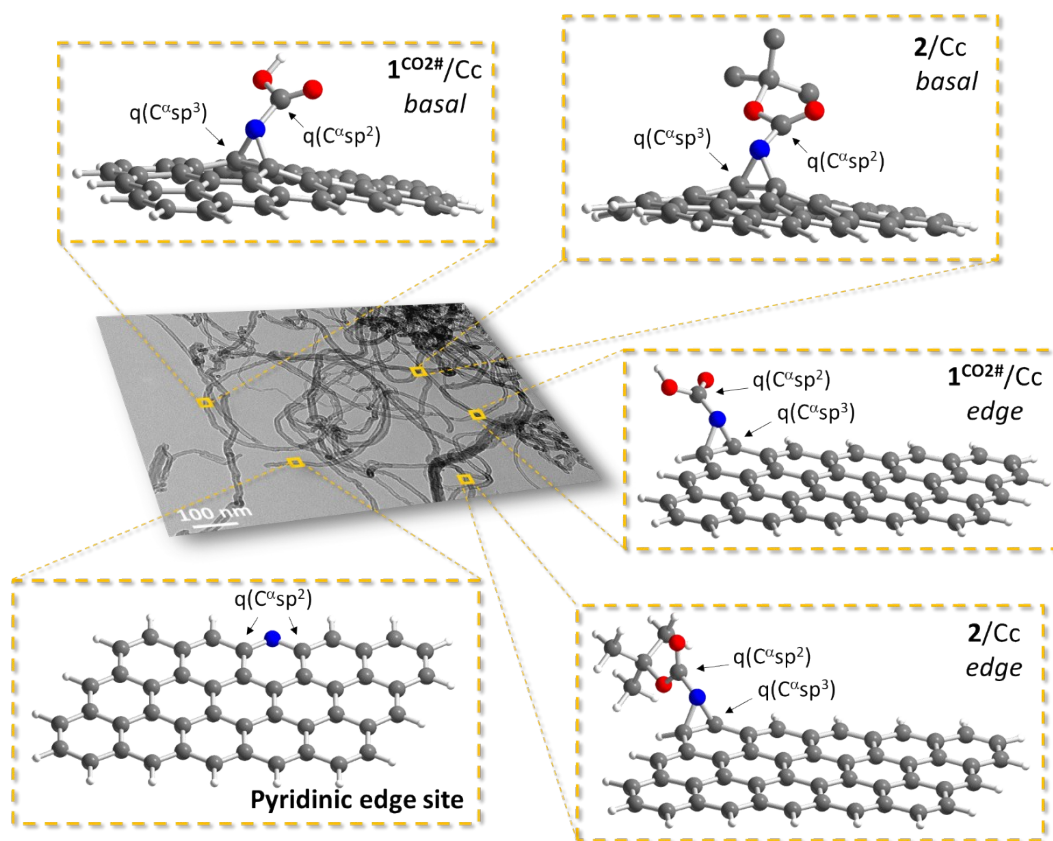

**Fig. S8.** DFT optimized structures of aziridine NBoc- and NH-carbonate groups as edge or basal plane dangling moieties on a polycyclic aromatic hydrocarbon cluster model. The same cluster with a pyridinic edge N-site has also been optimized to calculate the Bader atomic charges at the neighboring C<sup>α</sup> atoms. TEM micrograph refers to a bundle portion of sample **1**.

| Optimized samples                    | q(C <sup>α</sup> sp <sup>3</sup> ) | q(C <sup>α</sup> sp <sup>2</sup> ) |
|--------------------------------------|------------------------------------|------------------------------------|
| <b>1</b> <sup>CO2#</sup> /Cc – basal | +0.83                              | +3.93                              |
| <b>1</b> <sup>CO2#</sup> /Cc - edge  | +0.60                              | +3.94                              |
| <b>2</b> /Cc – basal                 | +0.87                              | +3.93                              |
| <b>2</b> /Cc - edge                  | +0.23                              | +3.18                              |
| pyridinic edge group                 | -                                  | +1.32                              |

**Table S3.** Net Bader Charges (q) of the C<sup>α</sup>sp<sup>3</sup>/C<sup>α</sup>sp<sup>2</sup> atoms on DFT optimized N-heterocycles as edge or basal-plane dangling fragments of a polycyclic (hetero)aromatic hydrocarbon cluster.



### References and Notes.

1. M. K. Daletoua, F. Paloukisa and A. Stefopoulosa, *ECS Trans.*, 2009, **25**, 1915-1924
2. C. A. Dyke, M. P. Stewart, F. Maya and J. M. Tour, *Synlett*, 2004, 155-160
3. B. K. Price and J. M. Tour, *J. Am. Chem. Soc.*, 2006, **128**, 12899-12904
4. *ABS* (Acrylonitrile-Butadiene-Styrene) is a common base-resistant thermoplastic polymer for 3D-printing.
5. C. Ning, P. Hadi, M. Xu, C. S. Ki Lin and G. McKay, *ACS Sustainable Chem. Eng.*, 2016, **4**, 2980-2989
6. F. Qian, X. Li, L. Tang, S. K. Lai, C. Lu and S. P. Lau, *AIP Adv.*, 2016, **6**, 075116
